# Supplementary material for: Adipocytes promote ovarian cancer chemoresistance
Source: Sci Rep. 2019 Sep 16;9:13316. doi: 10.1038/s41598-019-49649-1 (PMC6746782; doi:10.1038/s41598-019-49649-1)
Supplement: Supplementary file 1 — Supplemental Figures [file 41598_2019_49649_MOESM1_ESM.pdf]

## **Adipocytes promote ovarian cancer chemoresistance**

Jiang Yang, Munir M. Zaman, Iliyan Vlasakov, Roopali Roy, Lan Huang, Camilia R. Martin, Steven D. Freedman, Charles N. Serhan and Marsha A. Moses

**Supplemental Figure 1**

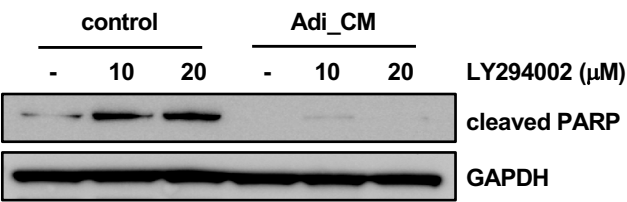

**Supplemental Figure 1. LY294002 induces minimal cell death in OVCAR5 cells treated with adipocyte CM.**

# Supplemental Figure 2

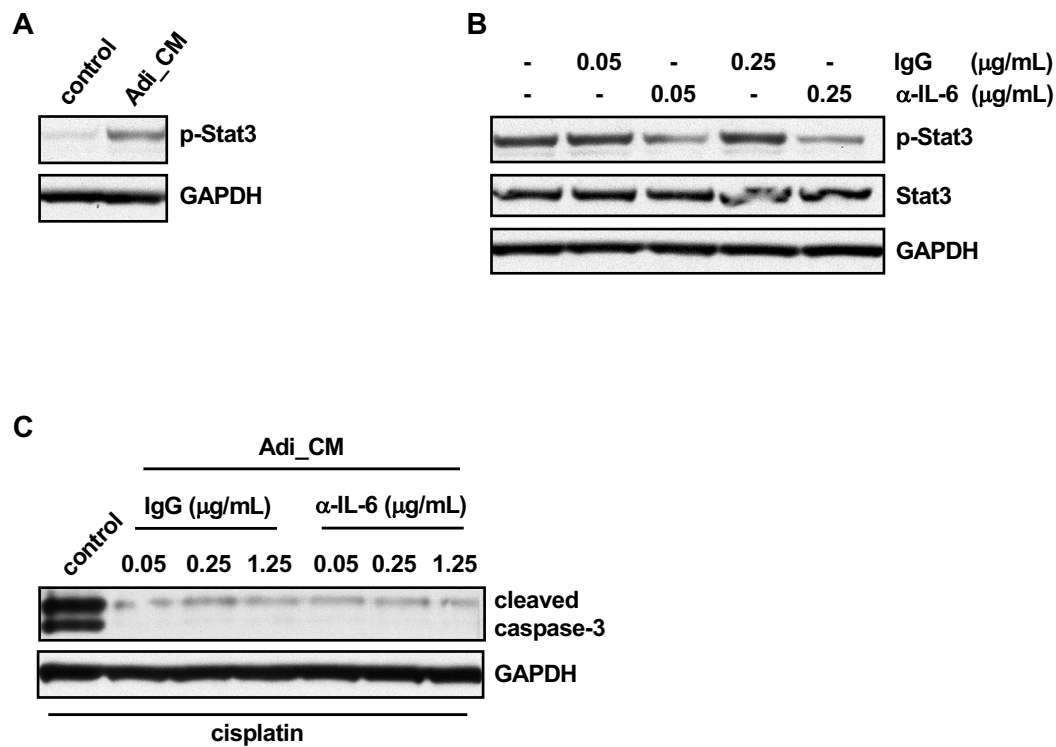

**Supplemental Figure 2. Adipocyte-induced chemoresistance is not mediated through the IL-6/Stat3 pathway.** **A)** Adipocyte CM induced Stat-3 phosphorylation. **B)** Treatment of adipocyte CM with IL-6 neutralizing antibody inhibited Stat3 phosphorylation. **C)** Cisplatin-induced apoptosis was inhibited in the presence of adipocyte CM; depletion of IL-6 from the CM did not diminish the chemo-protective effects.

# Supplemental Figure 3

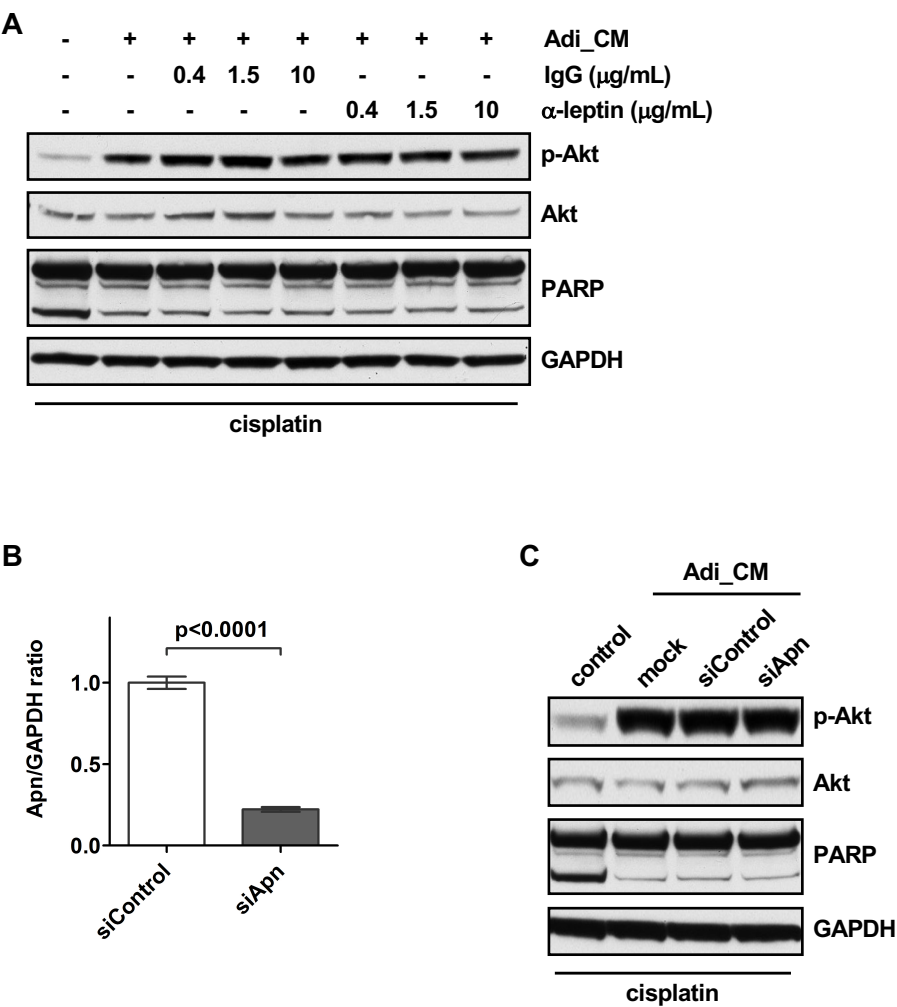

**Supplemental Figure 3. Adipocyte-induced chemoresistance is not mediated through leptin or adiponectin.** **A)** Leptin was blocked in the adipocyte CM with a neutralizing antibody and the lack of functional leptin did not compromise the effects of CM on Akt activation and cisplatin-induced apoptosis. **B)** Adiponectin (Apn) was silenced in adipocytes with specific siRNAs and its levels were analyzed with RT-PCR. **C)** Removal of adiponectin in adipocyte CM did not affect CM-induced Akt activation and CM-induced chemoresistance.

# Supplemental Figure 4

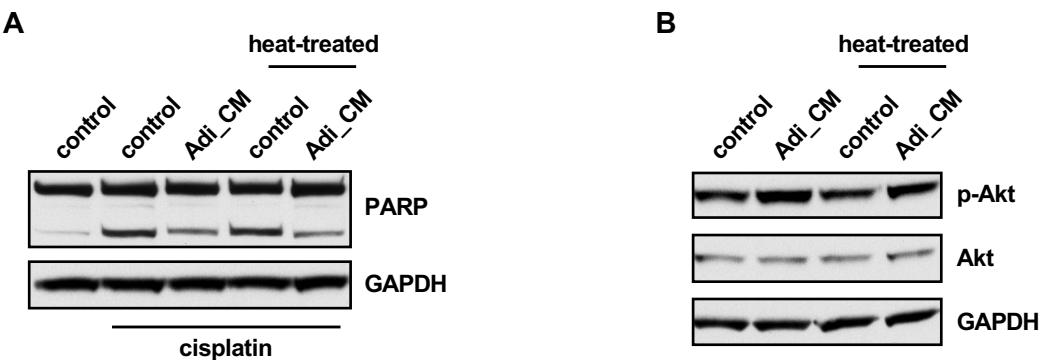

**Supplemental Figure 4. The secreted factor(s) from adipocytes that promotes chemoresistance is heat-resistant.** Heat treatment of adipocyte CM did not alter the capability of the CM to inhibit cisplatin-induced apoptosis (**A**) or to induce Akt activation (**B**).

## Supplemental Figure 5

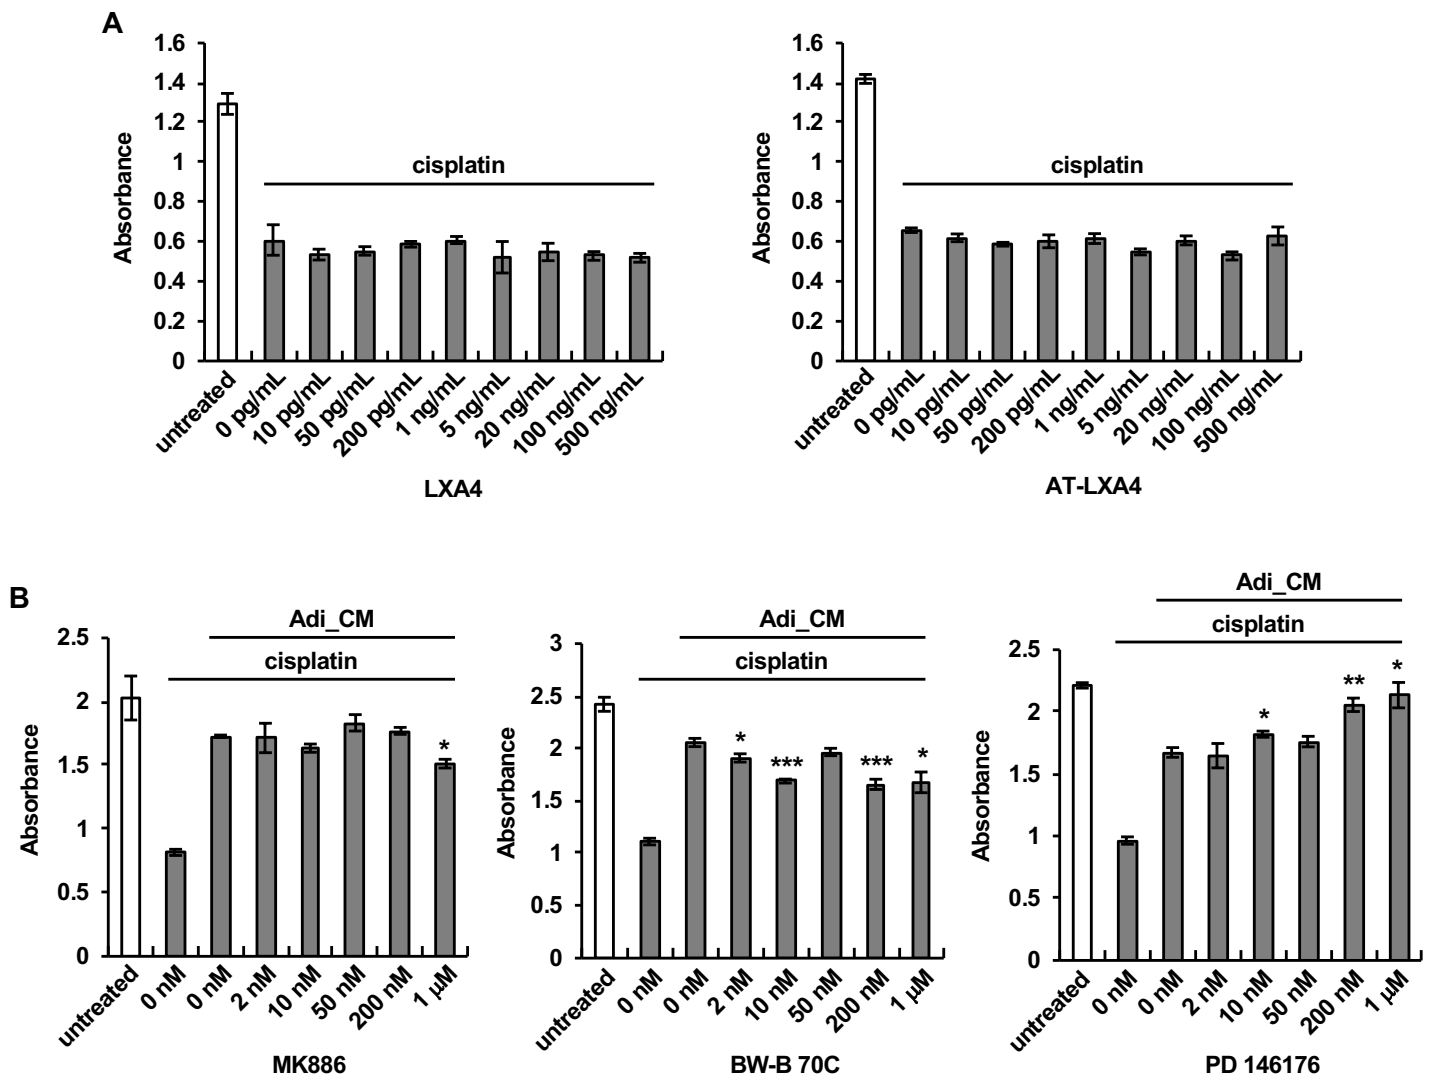

### Supplemental Figure 5. Lipoxins do not mediate adipocyte-induced

**chemoresistance.** OVCAR5 cells were treated with cisplatin together with different concentrations of lipoxin A<sub>4</sub> (LXA<sub>4</sub>) or AT-LXA<sub>4</sub> (**A**). Cell viability was analyzed 72 hours later. **B**) Adipocytes were treated with inhibitors against 5- or 15-LOX (MK886, BW-B 70C and PD 146176) before CM was collected. CM deficient of lipoxins was then applied on ovarian cancer cells together with cisplatin. \*  $p < 0.05$ , \*\*  $p < 0.01$  and \*\*\*  $p < 0.001$ , as compared to cells treated with cisplatin and control Adi\_CM.

## Supplemental Figure 6

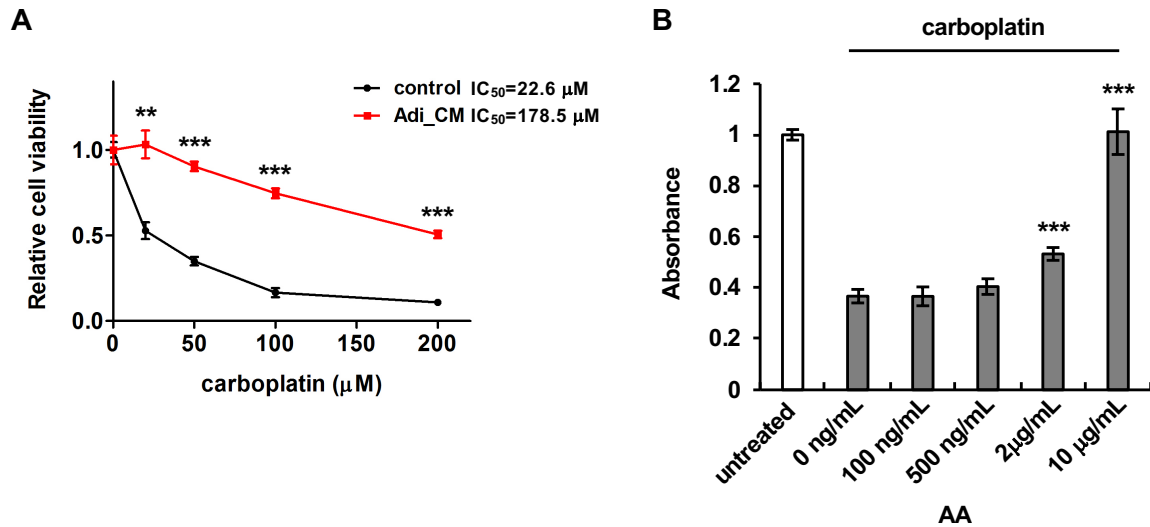

**Supplemental Figure 6. Adipocyte CM and arachidonic acid increase ovarian cancer cell chemoresistance to carboplatin.** **A)** OVCAR5 cells were incubated with adipocyte CM and different concentrations of carboplatin. **B)** OVCAR5 cells were treated with 50  $\mu\text{M}$  carboplatin and different concentrations of arachidonic acid (AA). Cell viability was analyzed 72 hours later. \*\*  $p < 0.01$ , \*\*\*  $p < 0.001$ .

**Supplemental Figure 7**

**Fig. 1D**

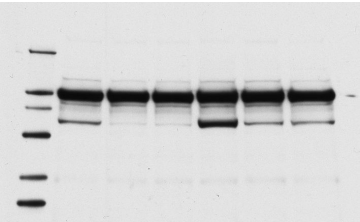

**Fig. 2A**

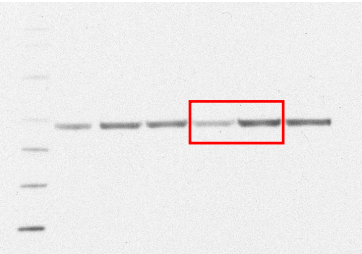

**Fig. 2B**

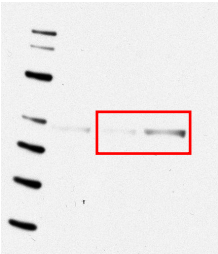

**Fig. 2C**

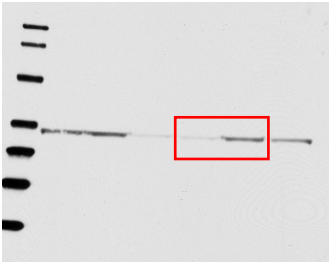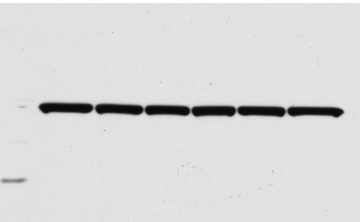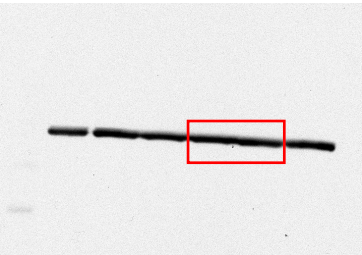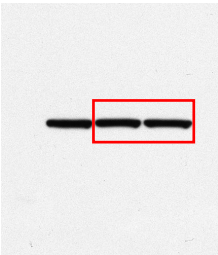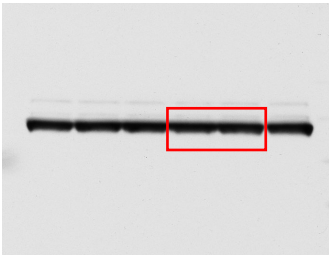

**Fig. 2D**

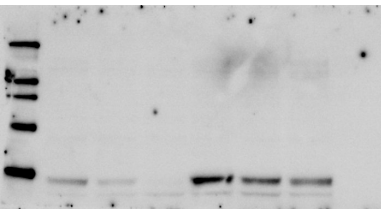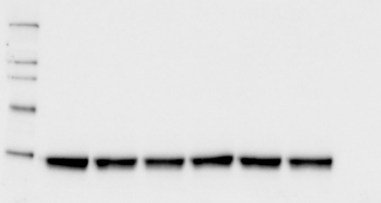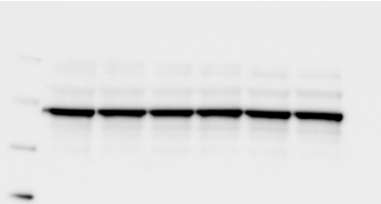

**Fig. 2E**

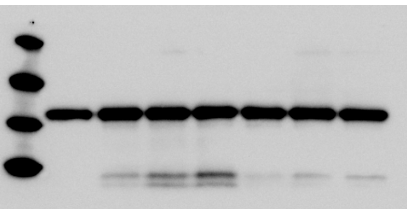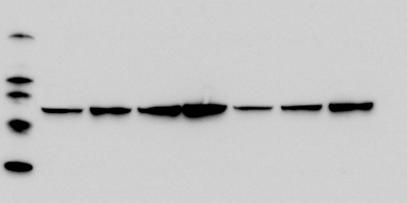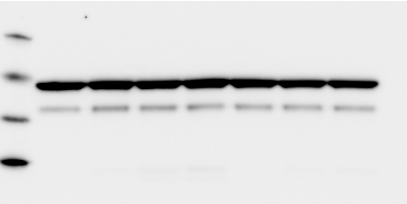

**Fig. 3C**

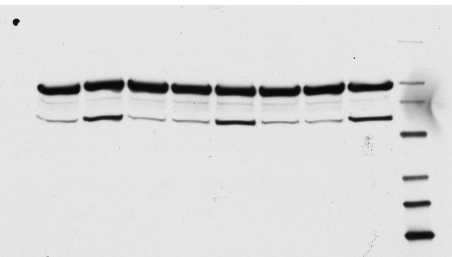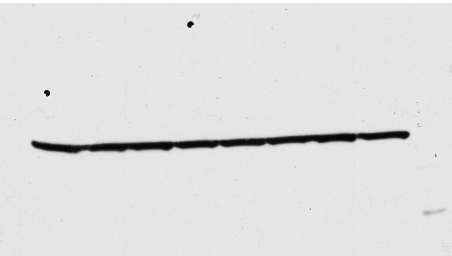

**Supplemental Figure 7. Uncropped images of Western Blots from Figure 1-3.**

**Supplemental Figure 8**

**Fig. 4A**

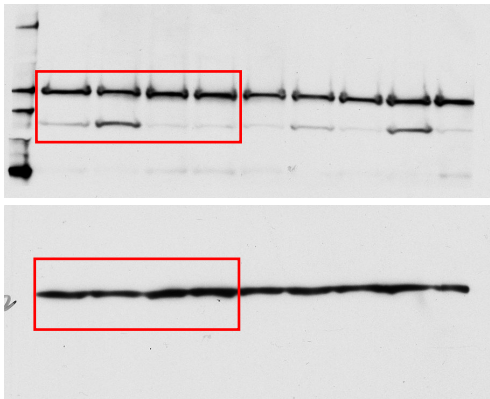

**Fig. 5E**

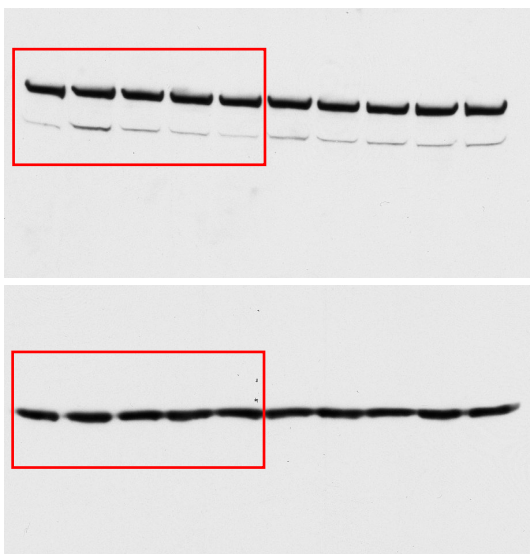

**Fig. 5F**

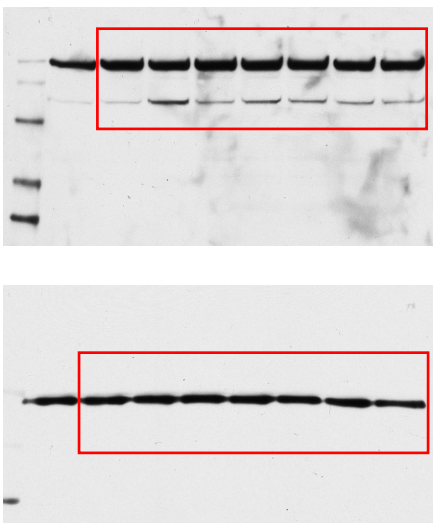

**Fig. 6B**

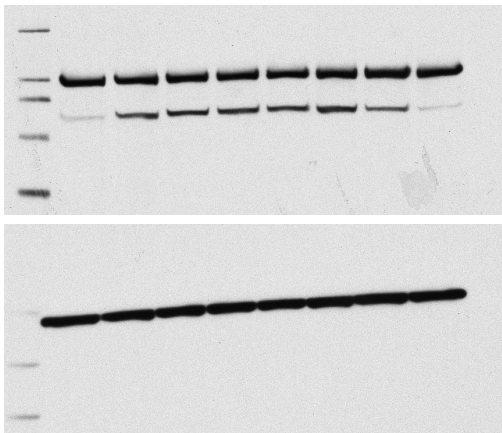

**Fig. 6C**

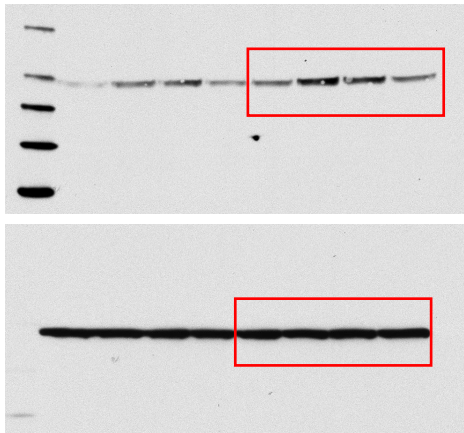

**Supplemental Figure 8. Uncropped images of Western Blots from Figure 4-6.**
